# Supplementary material
Source: PubMed Central journal article supplement (PMC9376299)
Supplement: mmc1.pdf [file mmc1.pdf]

**Supplemental information**

**Distinct sensitivities to SARS-CoV-2  
variants in vaccinated humans and mice**

**Alexandra C. Walls, Laura A. VanBlargan, Kai Wu, Angela Choi, Mary Jane Navarro, Diana Lee, Laura Avena, Daniela Montes Berrueta, Minh N. Pham, Sayda Elbashir, John C. Kraft, Marcos C. Miranda, Elizabeth Kepl, Max Johnson, Alyssa Blackstone, Kaitlin Sprouse, Brooke Fiala, Megan A. O'Connor, Natalie Brunette, Prabhu S. Arunachalam, Lisa Shirreff, Kenneth Rogers, Lauren Carter, Deborah H. Fuller, Francois Villinger, Bali Pulendran, Michael S. Diamond, Darin K. Edwards, Neil P. King, and David Veessler**

**Data S1: Normalized data curves relating to Figure 1**

| Page | Title                                                  |
|------|--------------------------------------------------------|
| 2    | Normalized neutralization curves relating to Figure 1A |
| 3    | Normalized neutralization curves relating to Figure 1B |
| 4    | Normalized neutralization curves relating to Figure 1C |
| 5    | Normalized neutralization curves relating to Figure 1D |
| 6    | Normalized neutralization curves relating to Figure 1E |
| 7    | Normalized neutralization curves relating to Figure 1F |
| 8    | Normalized neutralization curves relating to Figure 1G |

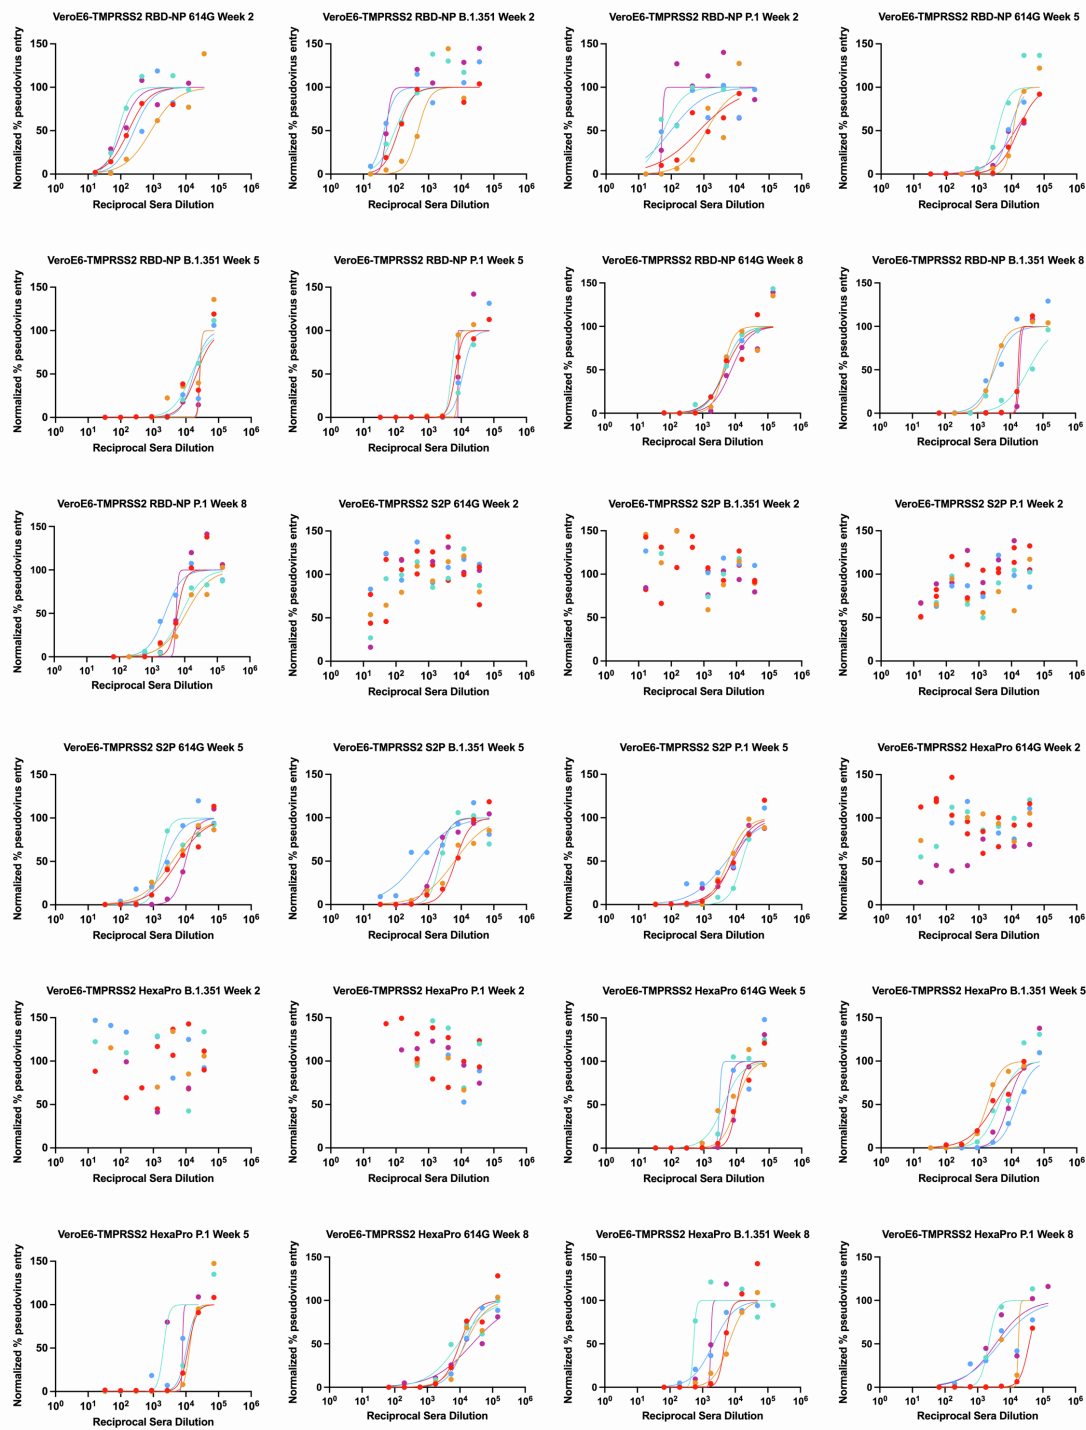

Normalized neutralization curves relating to Figure 1A. Each curve and color is a distinct mouse serum sample.

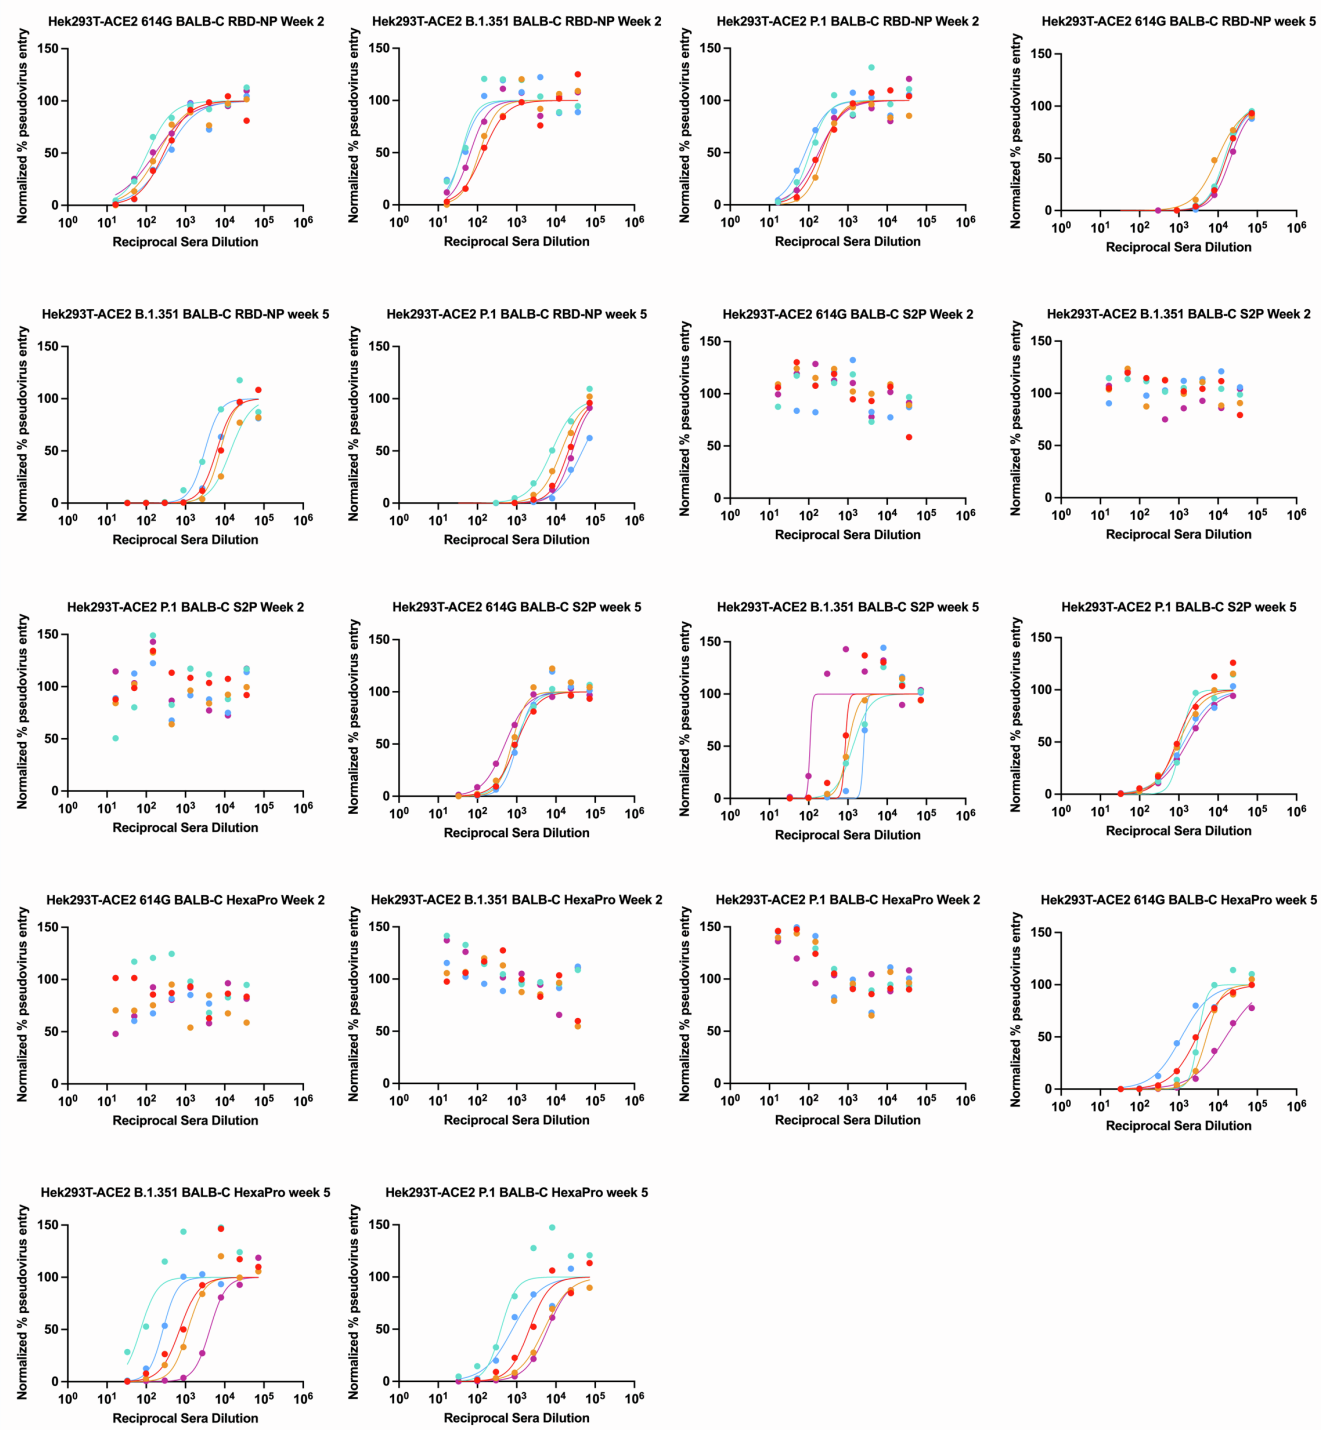

Normalized neutralization curves relating to Figure 1B. Each curve and color is a distinct mouse serum sample.

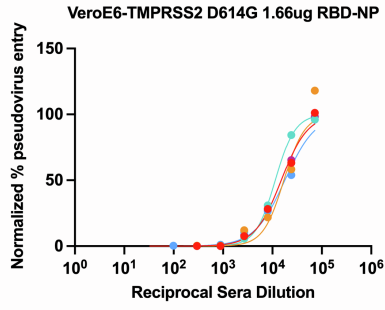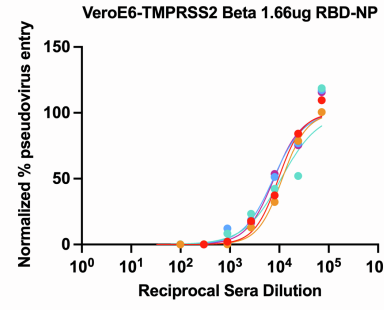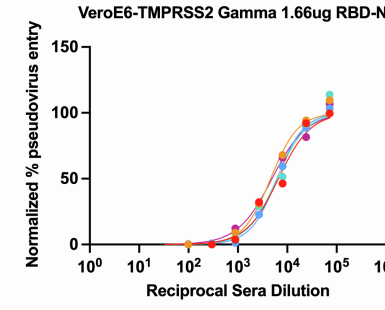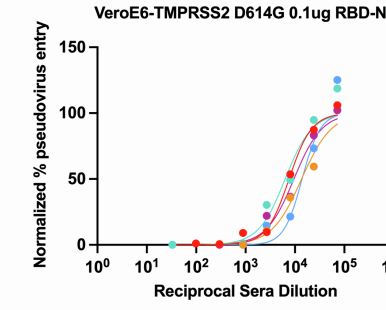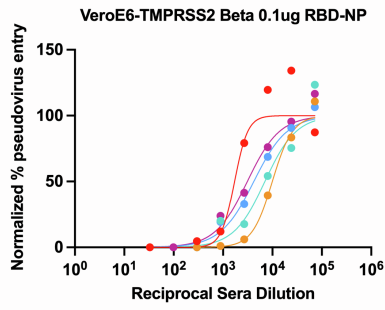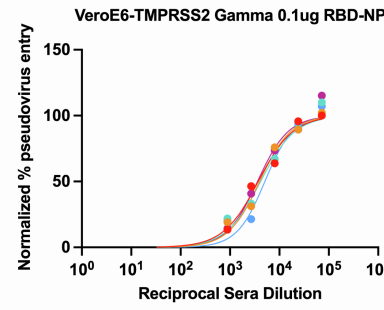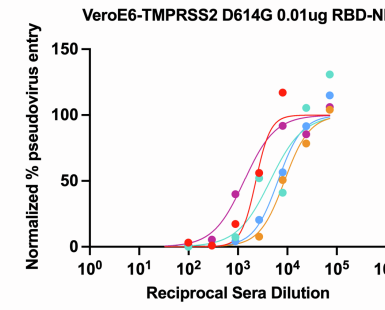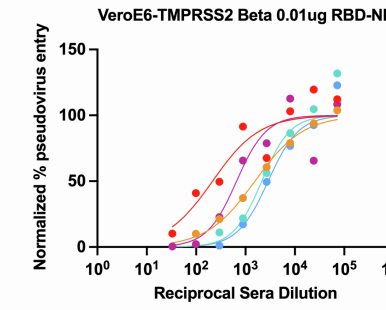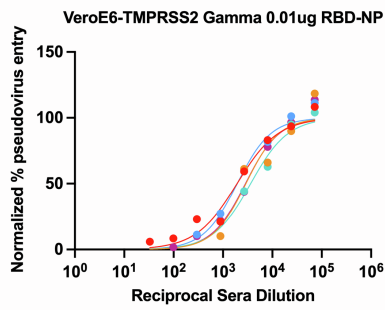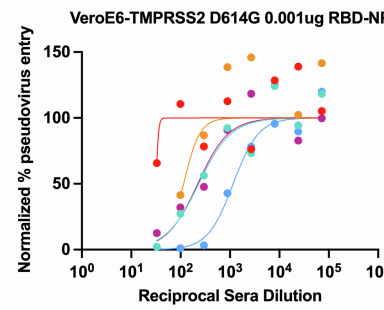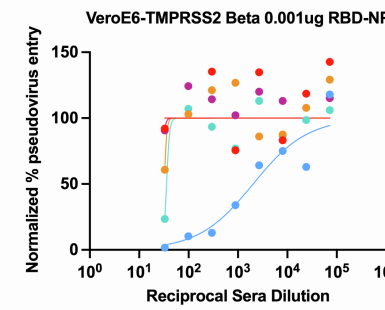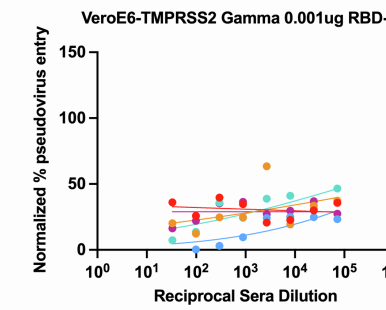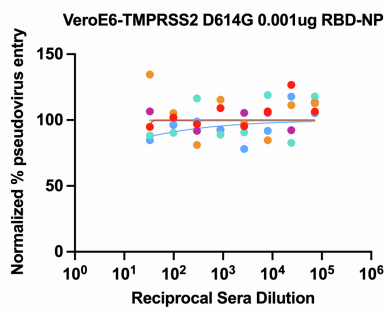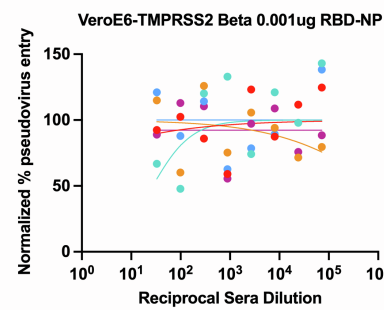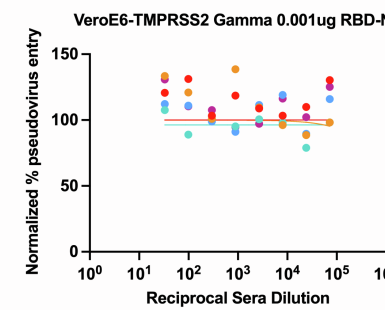

Normalized neutralization curves relating to Figure 1C. Each curve and color is a distinct mouse serum sample.



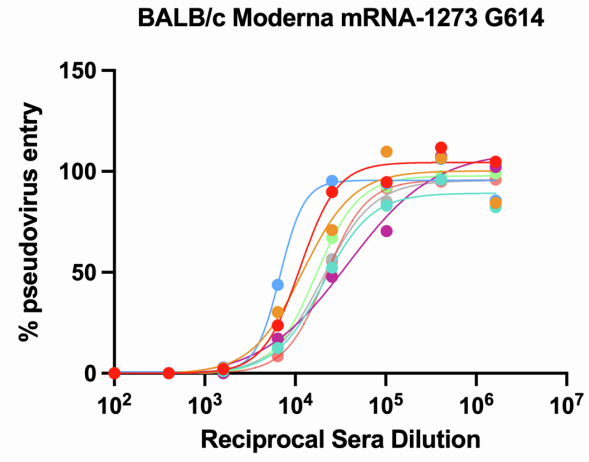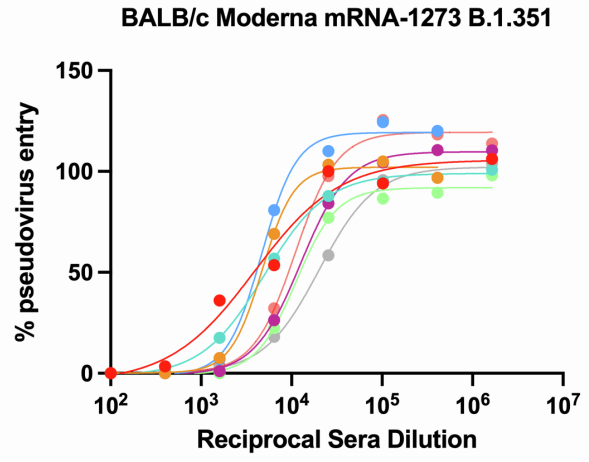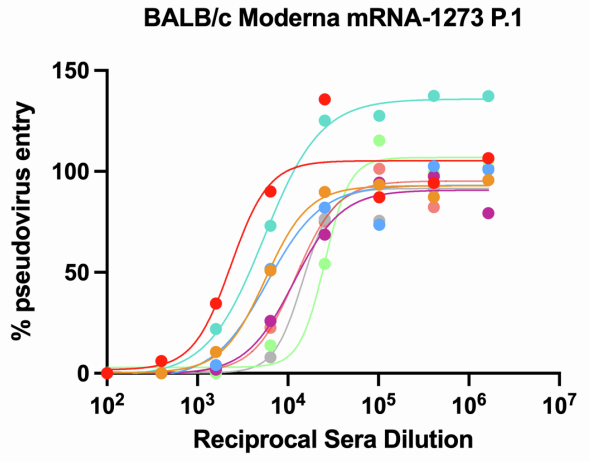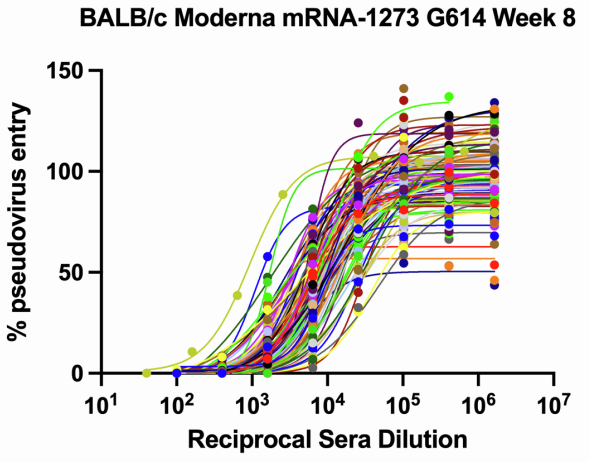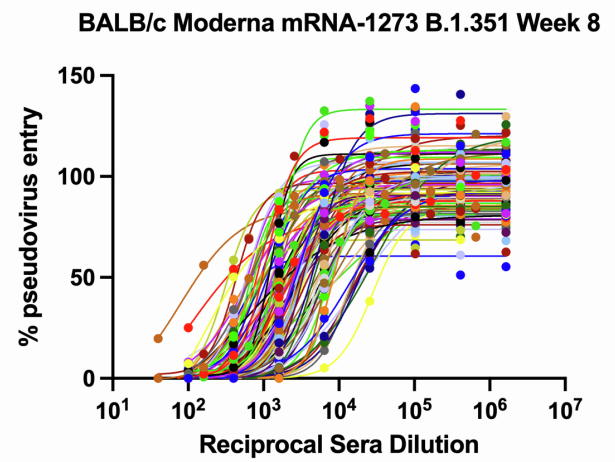

Normalized neutralization curves relating to Figure 1D. Each curve and color is a distinct mouse serum sample.

VeroE6-TMPRSS2 614G 129S2  
Moderna mRNA-1273 Week 5

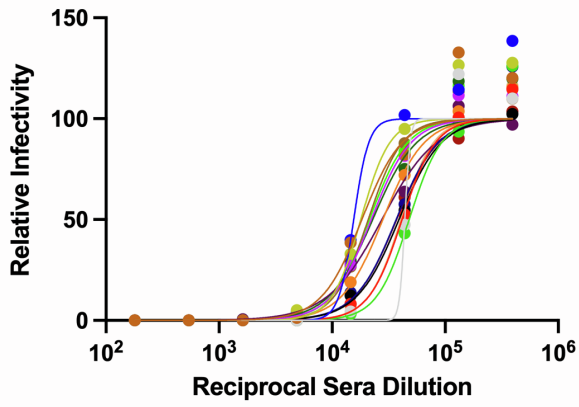

VeroE6-TMPRSS2 B.1.351 129S2  
Moderna mRNA-1273 Week 5

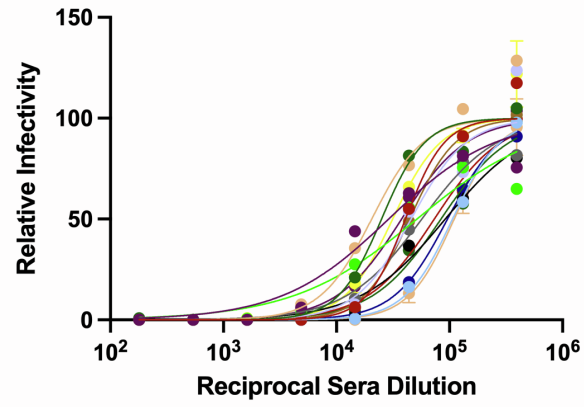

VeroE6-TMPRSS2 614G K18-hACE2  
Moderna mRNA-1273 Week 5

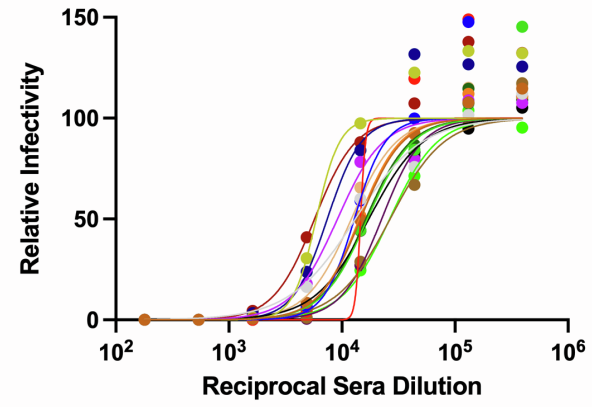

VeroE6-TMPRSS2 B.1.351 K18-hACE2  
Moderna mRNA-1273 Week 5

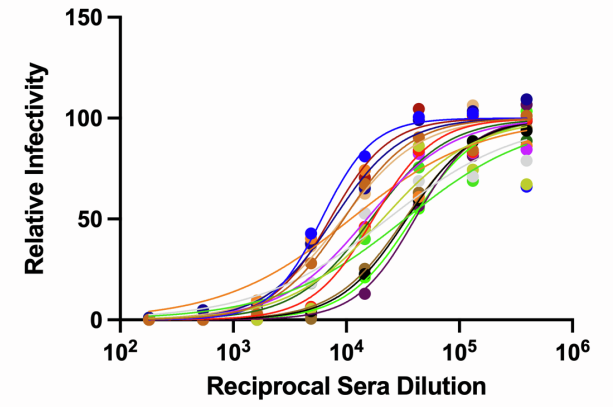

Normalized neutralization curves relating to Figure 1E. Each curve and color is a distinct mouse serum sample.

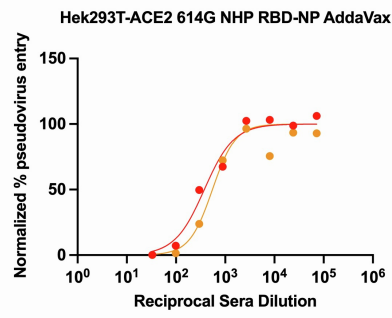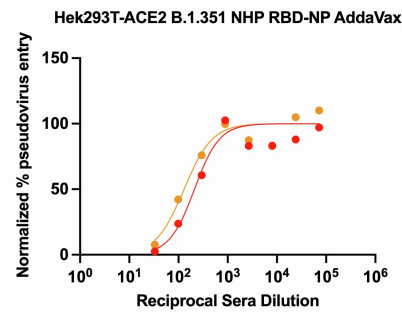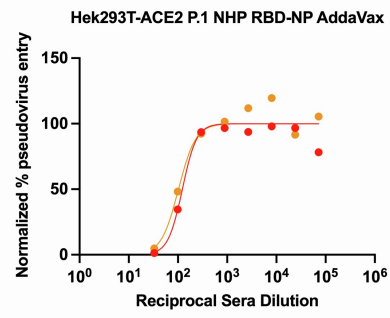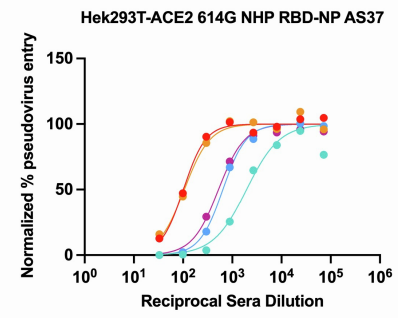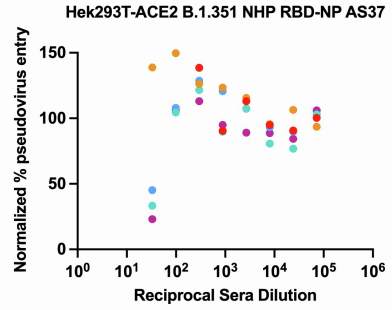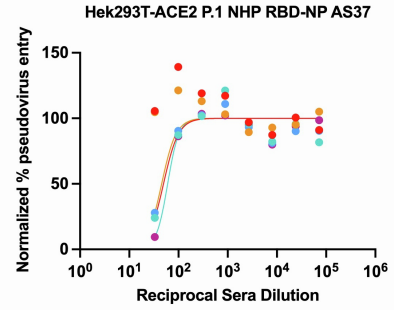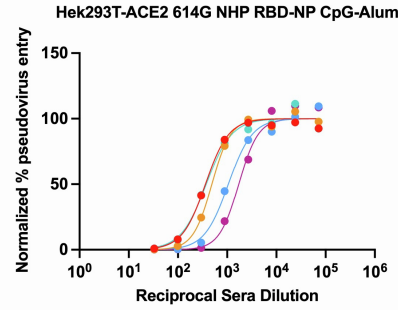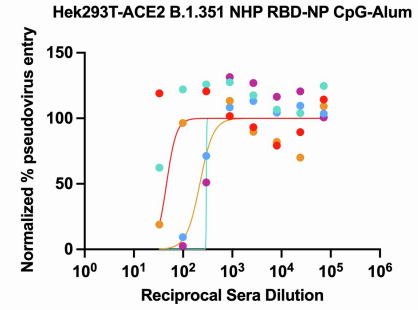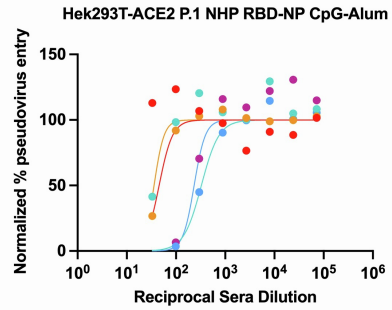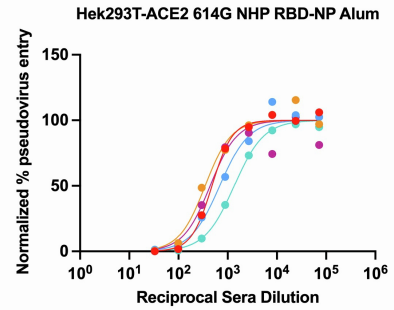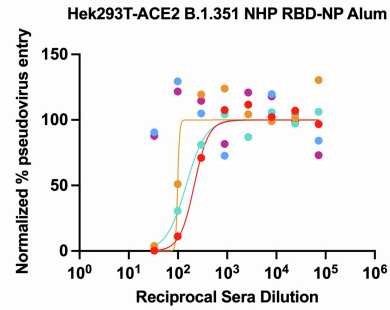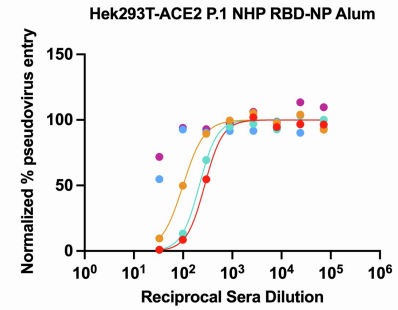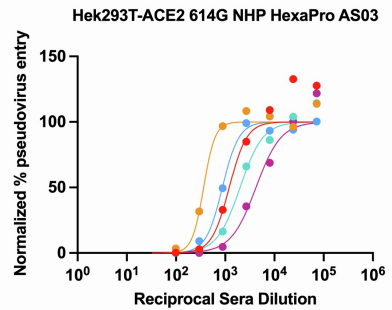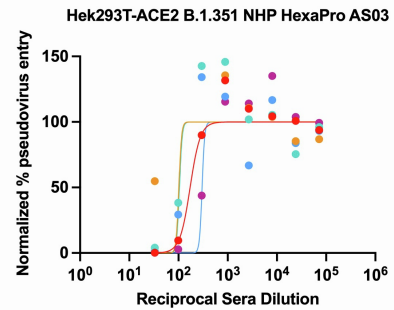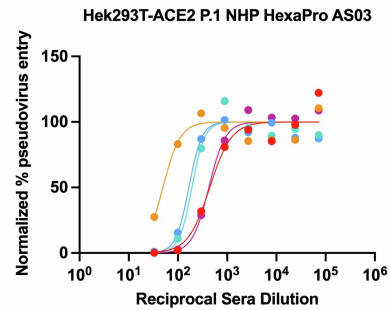

Normalized neutralization curves relating to Figure 1F. Each curve and color is a distinct non-human primate serum sample.

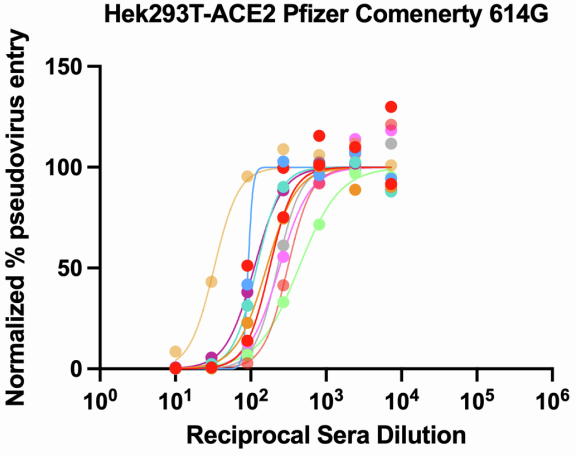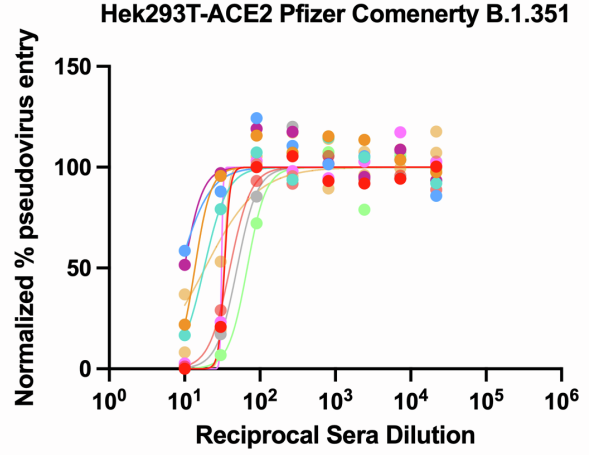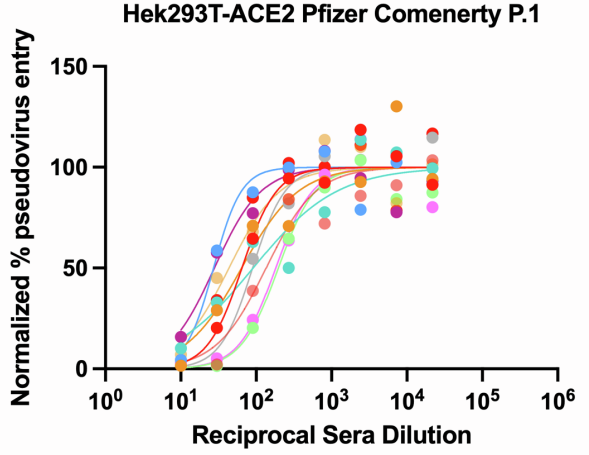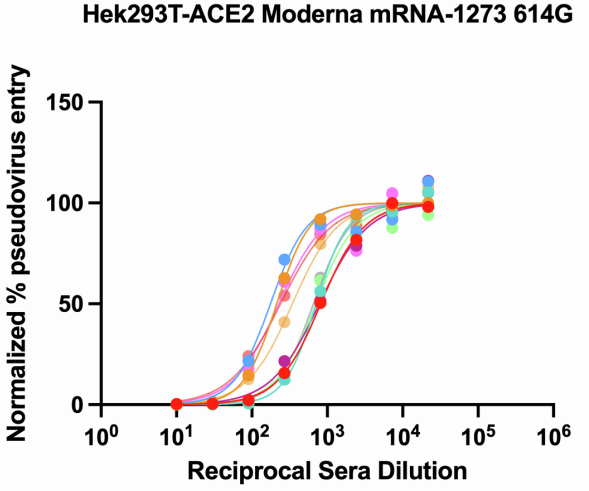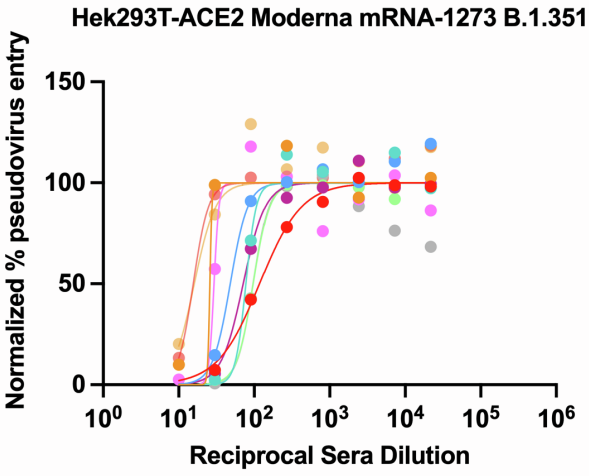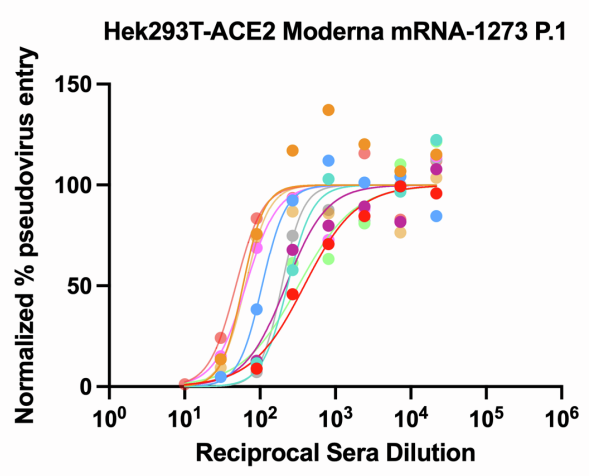

Normalized neutralization curves relating to Figure 1G Each curve and color is a distinct human serum sample.

| Study ID | Age | Vaccine Type | Days post second vaccine | M/F |
|----------|-----|--------------|--------------------------|-----|
| 136024   | 65  | Pfizer       | 10                       | M   |
| 136025   | 55  | Pfizer       | 18                       | M   |
| 136026   | 42  | Pfizer       | 9                        | F   |
| 136028   | 63  | Pfizer       | 10                       | M   |
| 136029   | 27  | Pfizer       | 8                        | F   |
| 136031   | 37  | Pfizer       | 21                       | F   |
| 136033   | 62  | Pfizer       | 15                       | M   |
| 136034   | 54  | Pfizer       | 14                       | F   |
| 136036   | 32  | Pfizer       | 13                       | F   |
| 136037   | 52  | Pfizer       | 11                       | M   |
| 136039   | 32  | Pfizer       | 22                       | F   |
| 136032   | 36  | Moderna      | 7                        | M   |
| 136040   | 40  | Moderna      | 20                       | M   |
| 136041   | 64  | Moderna      | 16                       | M   |
| 136042   | 34  | Moderna      | 23                       | F   |
| 136045   | 35  | Moderna      | 20                       | M   |
| 136046   | 40  | Moderna      | 24                       | M   |
| 136047   | 55  | Moderna      | 20                       | M   |
| 136050   | 36  | Moderna      | 27                       | F   |
| 136051   | 53  | Moderna      | 20                       | F   |
| 136052   | 47  | Moderna      | 21                       | M   |

**Table S1:** Demographics of human sera samples, related to Figure 1
